# Supplementary material for: Reactive-Oxygen-Species-Mediated P. aeruginosa Killing Is Functional in Human Cystic Fibrosis Macrophages
Source: PubMed Central journal article supplement (PMC3747231; doi:10.1371/journal.pone.0071717), 2013-08-19
Supplement: pone.0071717.s002.pdf [file pone.0071717.s002.pdf]

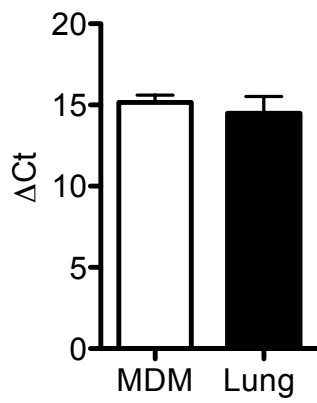

**Figure S2. CFTR expression by lung macrophages isolated from non-CF patients.** CFTR mRNA expression in macrophages isolated from lung parenchyma (Lung; n = 4) and from MDMs (n = 8), as detected by real-time PCR and quantified by the  $\Delta C_t$  method.
